# Supplementary material for: Human Cytomegalovirus Gene Expression in Long-Term Infected Glioma Stem Cells
Source: PLOS journal article supplement (doi:10.1371/journal.pone.0116178), 2014-12-30
Supplement: S3 (10.1371/journal.pone.0116178.s003) [file journal.pone.0116178.s003]

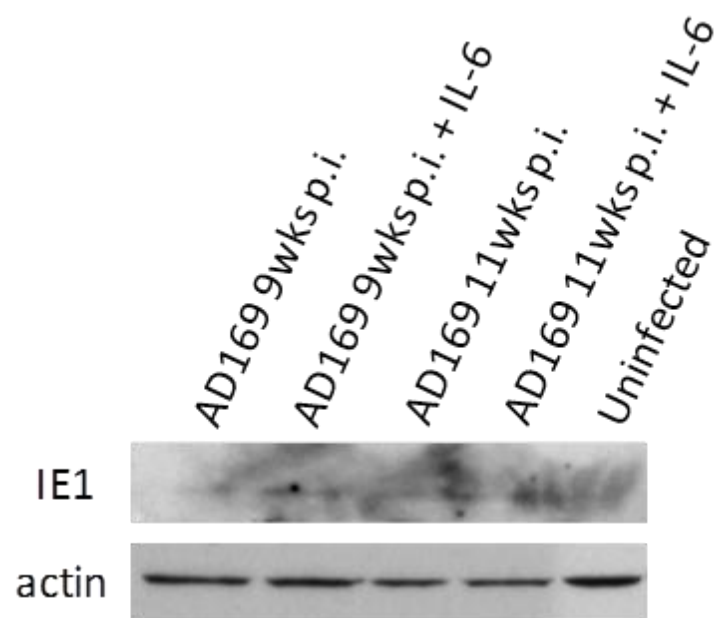

**S3 FIGURE**
